# Supplementary material for: DNA extract characterization process for microbial detection methods development and validation
Source: PubMed Central journal article supplement (PMC3599793; doi:10.1186/1756-0500-5-668), 2012-12-03

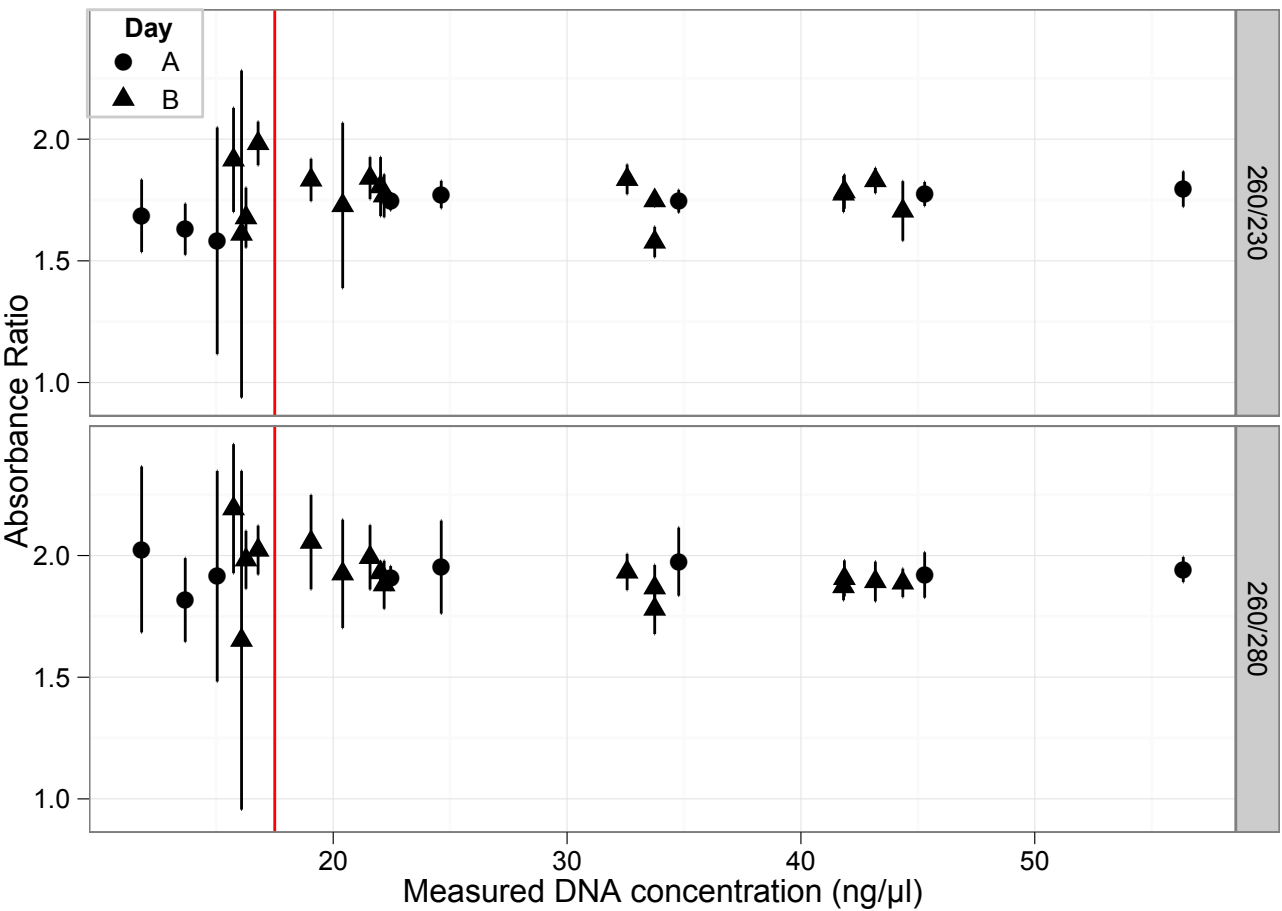

Supplement: 1756-0500-5-668-S2.pdf [file 1756-0500-5-668-S2.pdf]
